# Supplementary material
Source: PubMed Central journal article supplement (PMC2533765)
Supplement: NIHMS62921-supplement-1File008.pdf [file NIHMS62921-supplement-1File008.pdf]

## **Supporting Information For:**

### **Streptavidin in Antibody Pretargeting. 5. Chemical Modification of Recombinant Streptavidin for Labeling with the $\alpha$ -Particle Emitting Radionuclides $^{213}\text{Bi}$ and $^{211}\text{At}$ .**

.

D. Scott Wilbur<sup>\*,†</sup>, Donald K. Hamlin<sup>†</sup>, Ming-Kuan Chyan<sup>†</sup>, and Martin W. Brechbiel<sup>‡</sup>

<sup>†</sup>Department of Radiation Oncology, University of Washington, Seattle, WA 98195

<sup>‡</sup>National Cancer Institute, National Institutes of Health, Bethesda, MD

**Table S1: Distribution of Radioactivity for Co-injected [ $^{125}\text{I}$ ]- and [ $^{213}\text{Bi}$ ]-Labeled Succinylated rSAv, [ $^{125}\text{I}$ ]6b and [ $^{213}\text{Bi}$ ]6a, in BALB/c mice.**

**Table S2: Distribution of Radioactivity for Co-injected [ $^{125}\text{I}$ ]- and [ $^{211}\text{At}$ ]-Labeled Succinylated rSAv, [ $^{125}\text{I}$ ]2b and [ $^{211}\text{At}$ ]2b, in BALB/c mice.**

**Table S3: Distribution of Radioactivity for Co-injected [ $^{125}\text{I}$ ]- and [ $^{211}\text{At}$ ]-Labeled Succinylated rSAv, [ $^{125}\text{I}$ ]6c and [ $^{211}\text{At}$ ]6c, in BALB/c mice.**

**Table S4: Distribution of Radioactivity for Co-injected [ $^{125}\text{I}$ ]- and [ $^{211}\text{At}$ ]-Labeled Succinylated rSAv, [ $^{125}\text{I}$ ]6d and [ $^{211}\text{At}$ ]6d, in BALB/c mice.**

**Table S1: Distribution of Radioactivity for Co-injected [<sup>125</sup>I]- and [<sup>213</sup>Bi]-Labeled Succinylated rSAv, [<sup>125</sup>I]6b and [<sup>213</sup>Bi]6a, in BALB/c mice.<sup>a</sup>**

| Tissues            | <u>0.75 h</u> <sup>b,c</sup> |               | <u>1.5 h</u> |               | <u>3 h</u>   |               |
|--------------------|------------------------------|---------------|--------------|---------------|--------------|---------------|
|                    | <u>I-125</u>                 | <u>Bi-213</u> | <u>I-125</u> | <u>Bi-213</u> | <u>I-125</u> | <u>Bi-213</u> |
| blood              | 25.39 ± 8.40                 | 24.75 ± 8.23  | 22.04 ± 3.74 | 20.76 ± 3.69  | 20.97 ± 2.33 | 19.75 ± 2.27  |
| muscle             | 0.52 ± 0.10                  | 0.51 ± 0.08   | 0.60 ± 0.07  | 0.59 ± 0.11   | 0.72 ± 0.11  | 0.95 ± 0.27   |
| lung               | 9.02 ± 1.55                  | 8.64 ± 1.70   | 7.62 ± 1.14  | 7.48 ± 1.01   | 8.20 ± 1.61  | 8.06 ± 1.58   |
| kidney             | 6.69 ± 1.95                  | 8.08 ± 1.96   | 4.34 ± 0.89  | 5.67 ± 0.63   | 4.60 ± 0.72* | 7.17 ± 0.61*  |
| spleen             | 5.34 ± 0.64                  | 5.37 ± 0.61   | 4.01 ± 0.24  | 4.08 ± 0.40   | 4.34 ± 0.61  | 4.85 ± 0.98   |
| liver              | 5.03 ± 0.69                  | 5.33 ± 0.68   | 4.43 ± 0.73  | 4.83 ± 1.03   | 5.30 ± 0.75  | 5.96 ± 0.84   |
| intestine          | 1.90 ± 0.31                  | 1.87 ± 0.27   | 1.77 ± 0.21  | 1.60 ± 0.21   | 2.51 ± 0.34  | 2.50 ± 0.41   |
| neck               | 4.08 ± 0.81                  | 3.82 ± 0.86   | 2.43 ± 1.43  | 2.32 ± 1.42   | 2.90 ± 1.18  | 2.94 ± 0.95   |
| stomach            | 1.05 ± 0.24                  | 0.98 ± 0.25   | 1.34 ± 0.21  | 1.20 ± 0.29   | 2.69 ± 2.26  | 2.49 ± 1.42   |
| urine <sup>d</sup> | 15.61 ± 5.26                 | 22.91 ± 7.82  | 9.17 ± 2.42  | 12.04 ± 3.49  | 8.65 ± 4.74  | 9.73 ± 5.09   |

<sup>a</sup>Values shown are % injected dose / gram ± standard deviation. <sup>b</sup>Time of sacrifice from injection of radiolabeled rSAv derivatives, [<sup>125</sup>I]6b and [<sup>213</sup>Bi]6a. <sup>c</sup>Data were obtained for *n* = 5 mice at each time point; average animal weight, 32.36 ± 2.71 g; Injectate for each animal had 6 µCi/25 µg of [<sup>125</sup>I]6b and 14 µCi/25 µg of [<sup>213</sup>Bi]6a in approximately 100 µL of 0.9% sterile saline. <sup>d</sup>Urine was collected by syringe bladder tap after sacrifice. \*Significant difference found in values by paired Student's t test, P<0.05.

**Table S2: Distribution of Radioactivity for Co-injected [<sup>125</sup>I]- and [<sup>211</sup>At]-Labeled Succinylated rSAv, [<sup>125</sup>I]2b and [<sup>211</sup>At]2b, in BALB/c mice.<sup>a</sup>**

| Tissues            | <u>1 h</u> <sup>b,c</sup> |               | <u>4 h</u>    |               | <u>24 h</u>  |               |
|--------------------|---------------------------|---------------|---------------|---------------|--------------|---------------|
|                    | <u>I-125</u>              | <u>At-211</u> | <u>I-125</u>  | <u>At-211</u> | <u>I-125</u> | <u>At-211</u> |
| blood              | 37.09 ± 3.63*             | 25.02 ± 2.57* | 22.60 ± 1.40* | 13.30 ± 1.40* | 6.75 ± 1.64  | 6.48 ± 1.32   |
| muscle             | 1.13 ± 0.16               | 1.07 ± 0.15   | 1.97 ± 0.34*  | 1.32 ± 0.25*  | 1.29 ± 0.19* | 0.91 ± 0.27*  |
| lung               | 13.13 ± 2.00              | 13.76 ± 2.03  | 11.43 ± 1.88  | 10.03 ± 1.08  | 4.55 ± 0.72  | 4.72 ± 1.19   |
| kidney             | 11.18 ± 1.27              | 9.99 ± 1.10   | 7.07 ± 0.51*  | 5.58 ± 0.41*  | 3.29 ± 0.48  | 2.94 ± 0.48   |
| spleen             | 6.56 ± 0.92*              | 12.82 ± 1.67* | 5.03 ± 0.54*  | 7.97 ± 0.53*  | 4.69 ± 0.67  | 4.66 ± 0.80   |
| liver              | 7.52 ± 1.28               | 8.16 ± 1.37   | 6.88 ± 0.48   | 6.81 ± 0.78   | 6.06 ± 0.72  | 6.89 ± 0.96   |
| intestine          | 4.29 ± 0.52               | 4.81 ± 0.58   | 4.07 ± 0.73   | 4.31 ± 0.95   | 1.90 ± 0.28  | 1.79 ± 0.23   |
| neck               | 6.14 ± 1.70*              | 8.54 ± 1.27*  | 7.59 ± 0.36*  | 11.31 ± 1.70* | 6.78 ± 1.89  | 6.46 ± 2.33   |
| stomach            | 2.78 ± 0.30*              | 4.34 ± 0.44*  | 4.78 ± 0.57*  | 8.53 ± 1.91*  | 4.21 ± 0.96  | 5.13 ± 1.92   |
| urine <sup>d</sup> | 6.98 ± 2.45               | 9.99 ± 4.30   | 11.78 ± 12.84 | 15.26 ± 19.50 | 26.85 ± 8.10 | 23.58 ± 9.82  |

<sup>a</sup>Values shown are % injected dose / gram ± standard deviation. <sup>b</sup>Time of sacrifice from injection of radiolabeled succinylated-rSAv derivatives, [<sup>125</sup>I]2b and [<sup>211</sup>At]2b. <sup>c</sup>Data were obtained for *n* = 5 mice at each time point; average animal weight, 27.05 ± 1.61 g; Injectate for each animal had 7 µCi/25 µg of [<sup>125</sup>I]2b and 3 µCi/25 µg of [<sup>211</sup>At]2b in approximately 100 µL of 0.9% sterile saline. <sup>d</sup>Urine was collected by syringe bladder tap after sacrifice. \*Paired Student's *t* tests were run on all sets of data, asterisk denotes significant difference in values, *P*<0.05.

**Table S3: Distribution of Radioactivity for Co-injected [<sup>125</sup>I]- and [<sup>211</sup>At]-Labeled Succinylated rSAv, [<sup>125</sup>I]6c and [<sup>211</sup>At]6c, in BALB/c mice.<sup>a</sup>**

| Tissues            | <u>1 h</u> <sup>b,c</sup> |               | <u>4 h</u>    |               | <u>24 h</u>  |               |
|--------------------|---------------------------|---------------|---------------|---------------|--------------|---------------|
|                    | <u>I-125</u>              | <u>At-211</u> | <u>I-125</u>  | <u>At-211</u> | <u>I-125</u> | <u>At-211</u> |
| blood              | 41.51 ± 5.82              | 35.48 ± 4.85  | 28.07 ± 2.67* | 22.24 ± 1.81* | 8.13 ± 0.79  | 8.01 ± 0.72   |
| muscle             | 1.04 ± 0.30               | 1.01 ± 0.32   | 1.96 ± 0.36*  | 1.48 ± 0.30*  | 1.49 ± 0.21  | 1.32 ± 0.33   |
| lung               | 15.41 ± 1.86              | 15.76 ± 2.12  | 12.17 ± 1.49  | 10.94 ± 1.17  | 4.99 ± 0.53  | 5.51 ± 0.45   |
| kidney             | 11.97 ± 1.74              | 11.76 ± 1.10  | 10.70 ± 0.74* | 8.90 ± 0.64*  | 8.89 ± 0.57  | 7.94 ± 1.06   |
| spleen             | 7.77 ± 1.85               | 10.08 ± 2.12  | 6.54 ± 0.72*  | 8.00 ± 1.02*  | 6.61 ± 0.47* | 7.58 ± 0.46*  |
| liver              | 8.99 ± 0.94               | 10.10 ± 1.16  | 9.59 ± 0.49   | 10.20 ± 0.71  | 8.60 ± 0.76* | 10.93 ± 0.85* |
| intestine          | 3.99 ± 1.03               | 4.24 ± 1.16   | 5.10 ± 0.84   | 5.37 ± 1.05   | 3.18 ± 0.57  | 3.78 ± 0.71   |
| neck               | 6.75 ± 1.00               | 6.20 ± 0.96   | 8.86 ± 0.79   | 8.05 ± 1.06   | 8.78 ± 2.75  | 9.07 ± 1.70   |
| stomach            | 2.83 ± 0.34*              | 2.31 ± 0.35*  | 5.35 ± 1.09   | 4.62 ± 1.48   | 3.94 ± 0.60* | 5.19 ± 0.85*  |
| urine <sup>d</sup> | 5.41 ± 0.82*              | 3.82 ± 0.79*  | 20.27 ± 9.72  | 15.25 ± 7.85  | 13.78 ± 4.17 | 9.66 ± 3.28   |

<sup>a</sup>Values shown are % injected dose / gram ± standard deviation. <sup>b</sup>Time of sacrifice from injection of radiolabeled succinylated-rSAv derivatives, [<sup>125</sup>I]6c and succ[<sup>211</sup>At]6c. <sup>c</sup>Data were obtained for *n* = 5 mice at each time point; average animal weight, 26.94 ± 1.75 g; Injectate for each animal had 8 μCi/25 μg of [<sup>125</sup>I]6c and 7 μCi/25 μg of [<sup>211</sup>At]6c in approximately 100 μL of 0.9% sterile saline. <sup>d</sup>Urine was collected by syringe bladder tap after sacrifice. \*Paired Student's *t* tests were run on all sets of data, asterisk denotes significant difference in values, *P*<0.05.

**Table S4: Distribution of Radioactivity for Co-injected [<sup>125</sup>I]- and [<sup>211</sup>At]-Labeled Succinylated rSAv, [<sup>125</sup>I]6d and [<sup>211</sup>At]6d, in BALB/c mice.<sup>a</sup>**

| Tissues            | <u>1 h</u> <sup>b,c</sup> |               | <u>4 h</u>   |               | <u>24 h</u>  |               |
|--------------------|---------------------------|---------------|--------------|---------------|--------------|---------------|
|                    | <u>I-125</u>              | <u>At-211</u> | <u>I-125</u> | <u>At-211</u> | <u>I-125</u> | <u>At-211</u> |
| blood              | 19.60 ± 3.35              | 17.77 ± 2.39  | 9.88 ± 0.67  | 9.30 ± 0.50   | 1.77 ± 0.22  | 1.73 ± 0.14   |
| muscle             | 0.55 ± 0.10               | 0.57 ± 0.11   | 0.70 ± 0.07  | 0.68 ± 0.10   | 0.69 ± 0.18  | 0.64 ± 0.11   |
| lung               | 5.76 ± 1.11               | 6.39 ± 1.36   | 4.71 ± 1.98  | 4.73 ± 1.67   | 1.97 ± 0.23  | 2.02 ± 0.29   |
| kidney             | 4.59 ± 2.09               | 5.98 ± 0.69   | 3.38 ± 0.75  | 3.94 ± 0.75   | 1.58 ± 0.46  | 1.66 ± 0.55   |
| spleen             | 3.75 ± 2.12               | 2.76 ± 1.88   | 2.22 ± 0.22* | 2.74 ± 0.28*  | 3.58 ± 1.17  | 3.48 ± 1.03   |
| liver              | 7.14 ± 0.63               | 2.21 ± 0.53   | 9.07 ± 0.41  | 9.41 ± 0.34   | 9.73 ± 1.71  | 8.77 ± 1.55   |
| intestine          | 1.51 ± 0.54               | 1.80 ± 0.47   | 2.34 ± 1.10  | 2.11 ± 0.91   | 0.69 ± 0.20  | 0.69 ± 0.19   |
| neck               | 2.61 ± 1.00               | 2.58 ± 1.16   | 2.99 ± 0.61  | 2.74 ± 1.36   | 2.97 ± 1.14  | 3.08 ± 1.25   |
| stomach            | 1.34 ± 0.36               | 1.19 ± 0.35   | 2.08 ± 0.47  | 1.68 ± 0.52   | 1.70 ± 0.27  | 1.74 ± 0.34   |
| urine <sup>d</sup> | 9.13 ± e.37               | 7.79 ± 2.99   | 5.35 ± 0.98  | 3.53 ± 1.41   | 0.58 ± 1.02  | 0.41 ± 0.83   |

<sup>a</sup>Values shown are % injected dose / gram ± standard deviation. <sup>b</sup>Time of sacrifice from injection of radiolabeled succinylated-rSAv derivatives, [<sup>125</sup>I]6d and [<sup>211</sup>At]6d. <sup>c</sup>Data were obtained for *n* = 4 mice at the 1 h time point and *n* = 5 mice at the 4 and 24 time points; average animal weight, 30.76 ± 2.34 g; Injectate for each animal had 8 μCi/25 μg of [<sup>125</sup>I]6d and 8 μCi/25 μg of [<sup>211</sup>At]6d in approximately 100 μL of 0.9% sterile saline.

<sup>d</sup>Urine was collected by syringe bladder tap after sacrifice. \*Paired Student's *t* tests were run on all sets of data, asterisk denotes significant difference in values, *P*<0.05.
